# Supplementary material for: High-throughput stem-loop RT-qPCR miRNA expression profiling using minute amounts of input RNA
Source: PubMed Central journal article supplement — Nucleic Acids Res. 2008 Oct 21;36(21):e143. doi: 10.1093/nar/gkn725 (PMC2588502; doi:10.1093/nar/gkn725), 2008-10-21
Supplement: gkn725_1.pdf [file gkn725_1.pdf]

Supplementary Figure 1

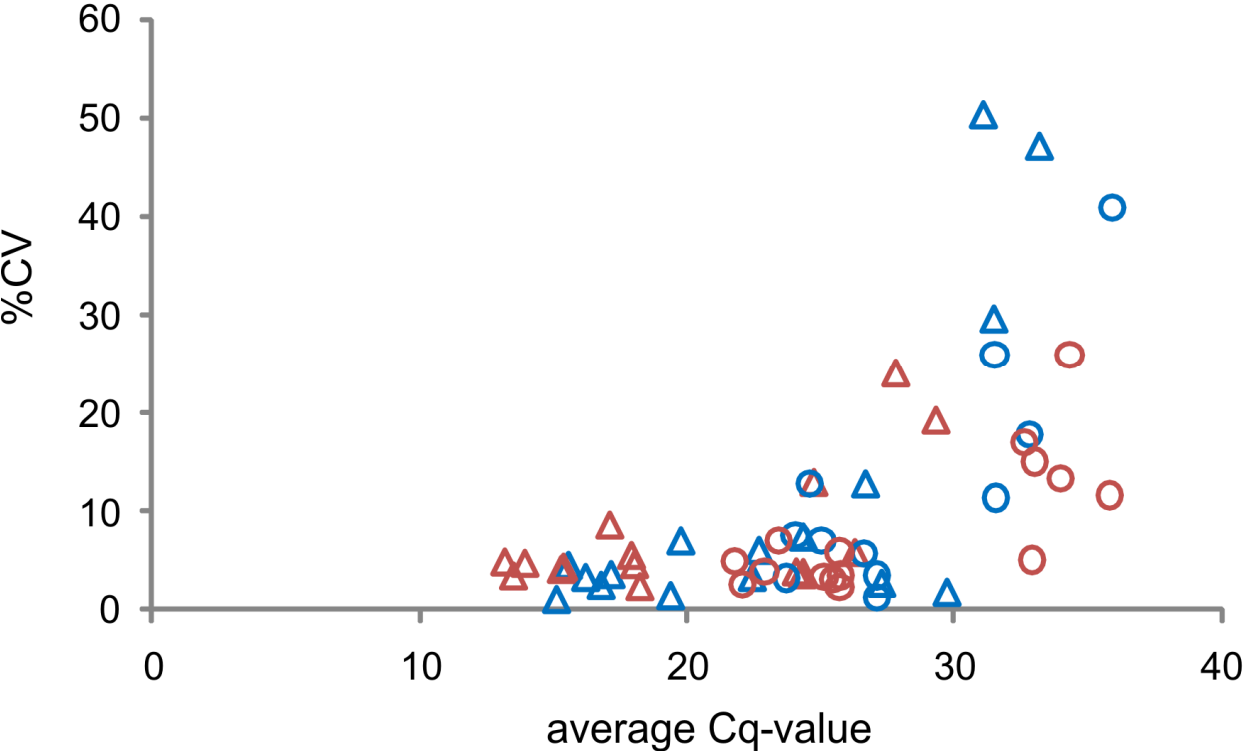

Supplementary Figure 2

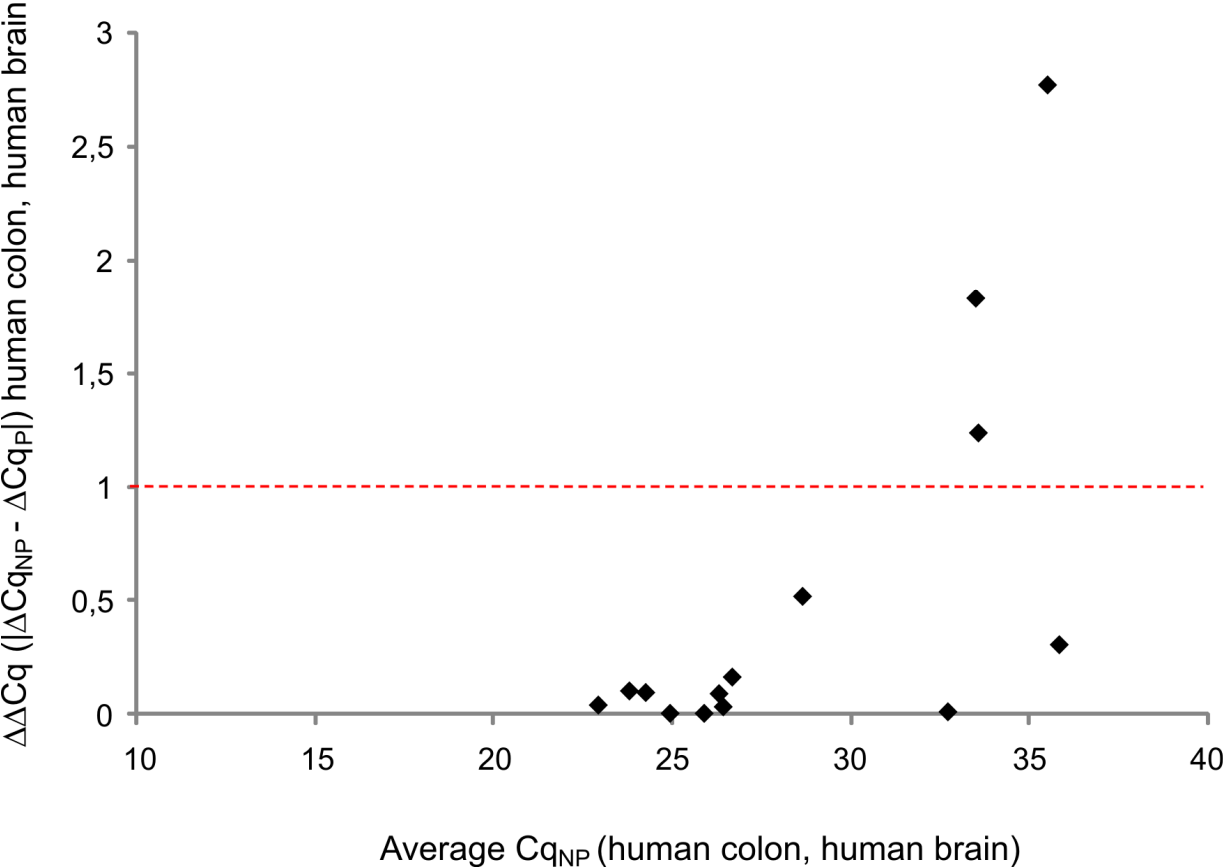

Supplementary Figure 3

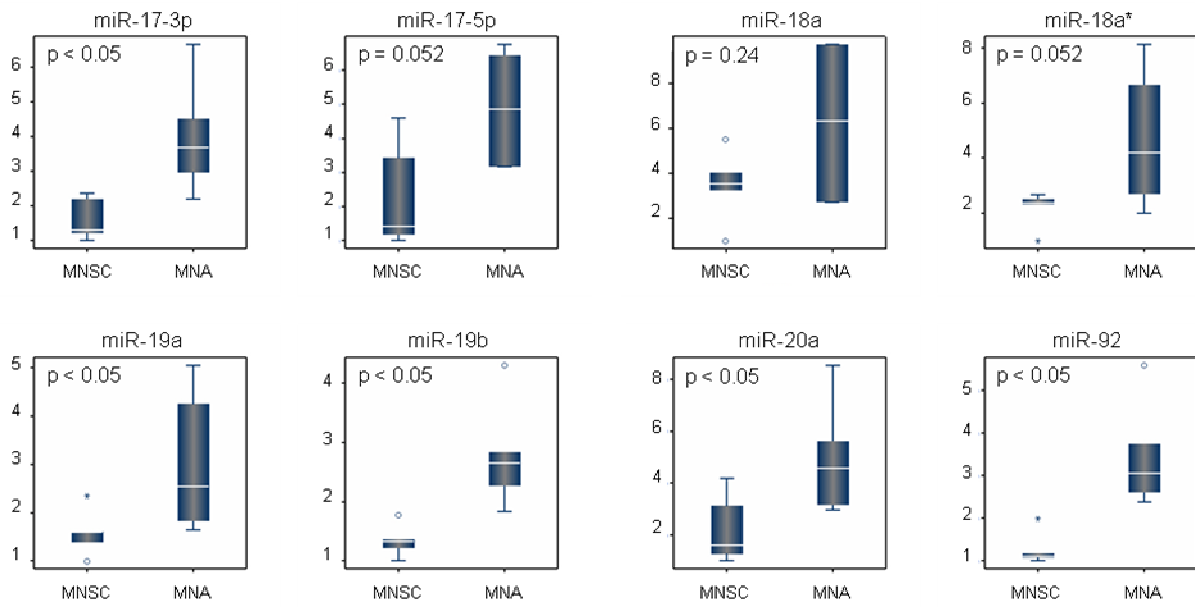

## Figure Legends

### Supplementary Figure 1

Scatter plot showing the relation between the average Cq-value and the reverse transcription variation (CV) for 16 individual miRNAs in 2 different RNA samples (human brain and human colon), profiled using both Megaplex alone and Megaplex with pre-amplification. Brain samples are depicted in red, colon samples in blue. Triangles represent miRNAs profiled using the Megaplex RT with pre-amplification whereas circles represent miRNAs profiled using Megaplex RT alone.

### Supplementary Figure 2

Difference in differential miRNA expression ( $\Delta\Delta Cq$ ) between human colon and human brain as measured using Megaplex RT alone ( $\Delta Cq_{NP}$ ) and Megaplex RT with pre-amplification ( $\Delta Cq_P$ ).  $\Delta\Delta Cq$ -values for 16 individual miRNAs are plotted in function of the average expression of each miRNA in the 2 samples as quantified by Megaplex RT alone (average  $Cq_{NP}$ ).

### Supplementary Figure 3

Boxplots representing the relative expression of miRNAs belonging to the mir-17-92 cluster in 2 groups of neuroblastoma cell lines: MYCN single copy cell lines (MNSC) and MYCN amplified cell lines (MNA). For each miRNA, Mann-Whitney p-values are indicated. MiRNA expression values were scaled relative to the cell line with the lowest expression.
